# Supplementary material for: Wealth and cardiovascular health: a cross-sectional study of wealth-related inequalities in the awareness, treatment and control of hypertension in high-, middle- and low-income countries
Source: PubMed Central journal article supplement (PMC5146857; doi:10.1186/s12939-016-0478-6), 2016-12-08
Supplement: 12939_2016_478_MOESM1_ESM.pdf [file 12939_2016_478_MOESM1_ESM.pdf]

## Appendix S1: Timing of data collection in each country

| 2006 World Bank Country Income Group | Country                        | Data collection dates |
|--------------------------------------|--------------------------------|-----------------------|
| High income                          | Canada                         | 2006-2009             |
|                                      | Sweden                         | 2005-2009             |
|                                      | United Arab Emirates           | 2006-2009             |
|                                      | Saudi Arabia                   | 2012-2014             |
| Upper-middle income                  | Argentina                      | 2006-2009             |
|                                      | Brazil                         | 2005-2009             |
|                                      | Chile                          | 2006-2009             |
|                                      | Malaysia                       | 2007-2009             |
|                                      | Poland                         | 2007-2009             |
|                                      | South Africa                   | 2005-2011             |
|                                      | Turkey                         | 2008-2009             |
| Lower-middle income                  | China                          | 2005-2010             |
|                                      | Philippines                    | 2013-2014             |
|                                      | Colombia                       | 2005-2009             |
|                                      | Iran                           | 2006-2009             |
|                                      | Occupied Palestinian Territory | 2012-2013             |
| Low income                           | Bangladesh                     | 2008                  |
|                                      | India                          | 2002-2007             |
|                                      | Pakistan                       | 2009-2011             |
|                                      | Zimbabwe                       | 2006-2007             |
|                                      | Tanzania                       | 2012-2014             |
