# Supplementary material for: Wealth and cardiovascular health: a cross-sectional study of wealth-related inequalities in the awareness, treatment and control of hypertension in high-, middle- and low-income countries
Source: PubMed Central journal article supplement (PMC5146857; doi:10.1186/s12939-016-0478-6), 2016-12-08
Supplement: 12939_2016_478_MOESM6_ESM.pdf [file 12939_2016_478_MOESM6_ESM.pdf]

**Appendix S6: Hypertension prevalence, awareness, treatment and control in the PURE cohort using higher threshold definition of hypertension, by country (ordered by 2006 GDP)**

| Country      | Participants  |                                   |               |             | Hypertensive participants |               |             |                         |               |             |                            |               |             |
|--------------|---------------|-----------------------------------|---------------|-------------|---------------------------|---------------|-------------|-------------------------|---------------|-------------|----------------------------|---------------|-------------|
|              | Number        | No. with Hypertension (%) [95%CI] |               |             | No. Aware (%) [95%CI]     |               |             | No. Treated (%) [95%CI] |               |             | No. Controlled (%) [95%CI] |               |             |
| Canada       | 10412         | 2395                              | (23.0)        | [21.4-24.7] | 2036                      | (85.0)        | [83.5-86.4] | 2014                    | (84.1)        | [82.5-85.6] | 1691                       | (70.6)        | [68.5-72.6] |
| Sweden       | 4150          | 1042                              | (25.1)        | [23.4-26.9] | 649                       | (62.3)        | [56.7-67.6] | 584                     | (56.0)        | [49.4-62.4] | 368                        | (35.3)        | [29.1-42.0] |
| UAE          | 918           | 308                               | (33.6)        | [30.6-36.7] | 242                       | (78.6)        | [73.6-82.8] | 236                     | (76.6)        | [71.5-81.0] | 158                        | (51.3)        | [45.7-56.9] |
| Saudi Arabia | 1729          | 346                               | (20.0)        | [17.9-22.4] | 312                       | (90.2)        | [85.9-93.2] | 306                     | (88.4)        | [84.0-91.8] | 265                        | (76.6)        | [70.1-82.1] |
| Argentina    | 7497          | 2455                              | (32.7)        | [31.3-34.2] | 1972                      | (80.3)        | [77.8-82.6] | 1881                    | (76.6)        | [74.0-79.1] | 1258                       | (51.2)        | [47.9-54.6] |
| Brazil       | 5581          | 2128                              | (38.1)        | [35.7-40.6] | 1844                      | (86.7)        | [85.3-87.9] | 1805                    | (84.8)        | [83.4-86.2] | 1254                       | (58.9)        | [56.9-61.0] |
| Chile        | 3270          | 1031                              | (31.5)        | [28.4-34.8] | 825                       | (80.0)        | [74.3-84.7] | 781                     | (75.8)        | [68.7-81.6] | 597                        | (57.9)        | [48.5-66.7] |
| Malaysia     | 11825         | 3313                              | (28.0)        | [26.0-30.1] | 2404                      | (72.6)        | [68.9-76.0] | 2209                    | (66.7)        | [62.4-70.7] | 1449                       | (43.7)        | [39.6-48.0] |
| Poland       | 2029          | 923                               | (45.5)        | [38.1-53.1] | 708                       | (76.7)        | [57.4-88.9] | 686                     | (74.3)        | [58.0-85.9] | 405                        | (43.9)        | [33.1-55.3] |
| South Africa | 3252          | 1127                              | (34.7)        | [24.6-46.3] | 537                       | (47.6)        | [34.5-61.2] | 551                     | (48.9)        | [40.2-57.6] | 250                        | (22.2)        | [17.0-28.3] |
| Turkey       | 4060          | 1030                              | (25.4)        | [23.3-27.6] | 844                       | (81.9)        | [78.3-85.1] | 789                     | (76.6)        | [72.7-80.1] | 575                        | (55.8)        | [50.1-61.4] |
| China        | 46751         | 10910                             | (23.3)        | [21.6-25.2] | 7330                      | (67.2)        | [61.8-72.1] | 6466                    | (59.3)        | [53.1-65.1] | 3752                       | (34.4)        | [28.3-41.0] |
| Philippines  | 1671          | 594                               | (35.5)        | [24.5-48.3] | 435                       | (73.2)        | [45.1-90.1] | 389                     | (65.5)        | [33.9-87.5] | 234                        | (39.4)        | [17.9-65.9] |
| Colombia     | 7506          | 1763                              | (23.5)        | [21.9-25.1] | 1365                      | (77.4)        | [74.6-80.0] | 1288                    | (73.1)        | [70.0-75.9] | 870                        | (49.3)        | [45.5-53.2] |
| Iran         | 6013          | 928                               | (15.4)        | [13.4-17.7] | 786                       | (84.7)        | [78.5-89.4] | 758                     | (81.7)        | [75.8-86.4] | 552                        | (59.5)        | [49.8-68.4] |
| OPT          | 1563          | 387                               | (24.8)        | [22.2-27.5] | 328                       | (84.8)        | [78.7-89.3] | 330                     | (85.3)        | [79.6-89.6] | 232                        | (59.9)        | [51.4-67.9] |
| Bangladesh   | 2747          | 598                               | (21.8)        | [19.4-24.3] | 215                       | (36.0)        | [29.5-43.0] | 167                     | (27.9)        | [22.6-33.9] | 82                         | (13.7)        | [10.1-18.4] |
| India        | 27458         | 4533                              | (16.5)        | [14.9-18.3] | 3101                      | (68.4)        | [63.6-72.9] | 2784                    | (61.4)        | [56.5-66.1] | 2045                       | (45.1)        | [40.2-50.2] |
| Pakistan     | 1294          | 244                               | (18.9)        | [13.6-25.6] | 178                       | (73.0)        | [62.4-81.4] | 157                     | (64.3)        | [50.9-75.8] | 118                        | (48.4)        | [41.9-54.9] |
| Zimbabwe     | 822           | 292                               | (35.5)        | [20.3-54.4] | 187                       | (64.0)        | [41.4-81.8] | 118                     | (40.4)        | [27.3-55.1] | 58                         | (19.9)        | [12.8-29.5] |
| Tanzania     | 1071          | 182                               | (17.0)        | [12.5-22.7] | 28                        | (15.4)        | [10.1-22.7] | 10                      | (5.5)         | [3.5-8.6]   | 3                          | (1.6)         | [0.6-4.8]   |
| <b>Total</b> | <b>151619</b> | <b>36529</b>                      | <b>(24.1)</b> |             | <b>26326</b>              | <b>(72.1)</b> |             | <b>24309</b>            | <b>(66.5)</b> |             | <b>16216</b>               | <b>(44.4)</b> |             |

OPT: Occupied Palestinian Territory; UAE: United Arab Emirates; GDP: gross domestic product; CI: confidence interval. Note: \*Hypertension higher threshold definition: systolic blood pressure  $\geq 160$  mm Hg or diastolic blood pressure  $\geq 100$  mm Hg or who report currently taking medication.
