# Supplementary material for: Wealth and cardiovascular health: a cross-sectional study of wealth-related inequalities in the awareness, treatment and control of hypertension in high-, middle- and low-income countries
Source: PubMed Central journal article supplement (PMC5146857; doi:10.1186/s12939-016-0478-6), 2016-12-08

**Appendix S8: Adjusted prevalence of hypertension awareness, treatment and control with 95% confidence intervals within PURE cohorts, by wealth quintile and country (ordered by 2006 GDP)**

(Note: \*Adjusted estimates for hypertension control by wealth quintile in Tanzania could not be obtained due to the low number of positive outcomes.)

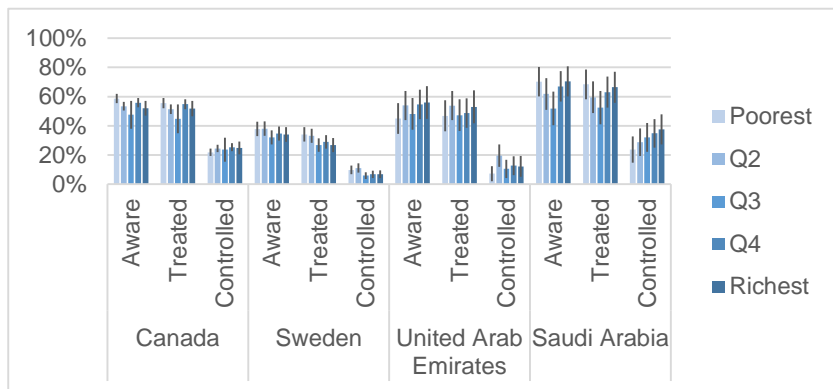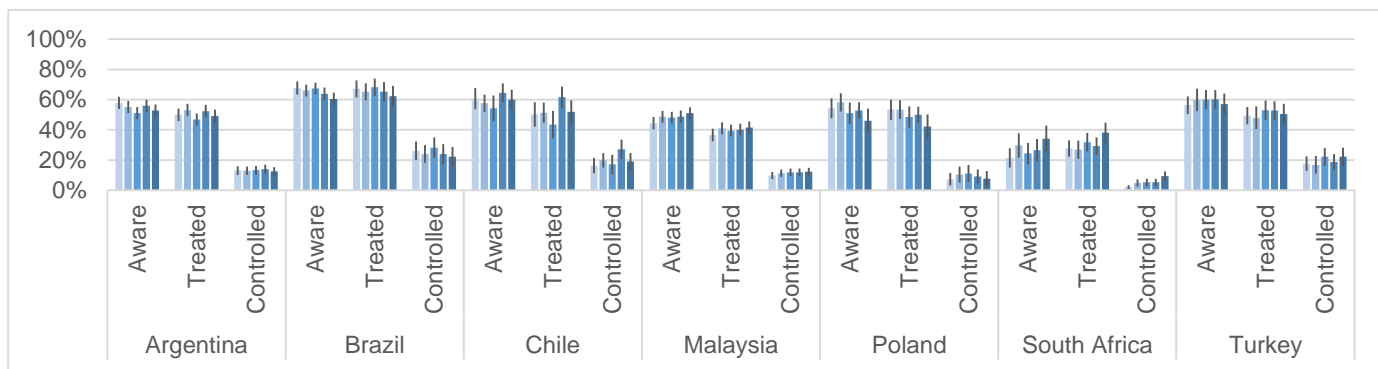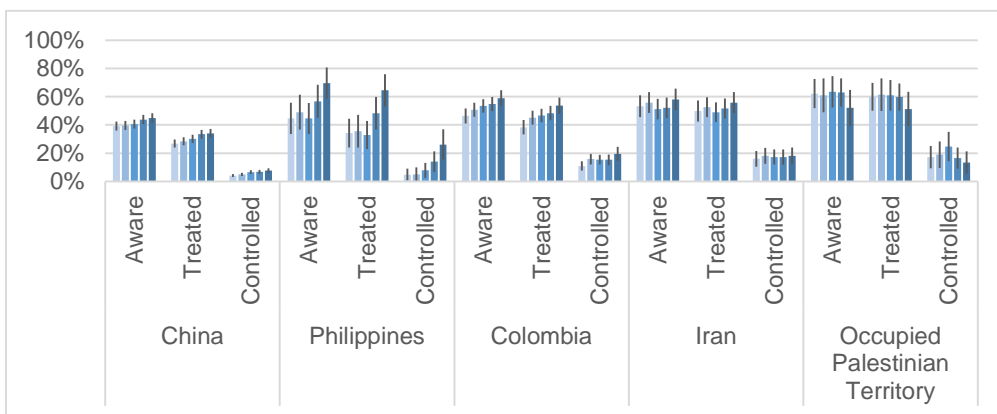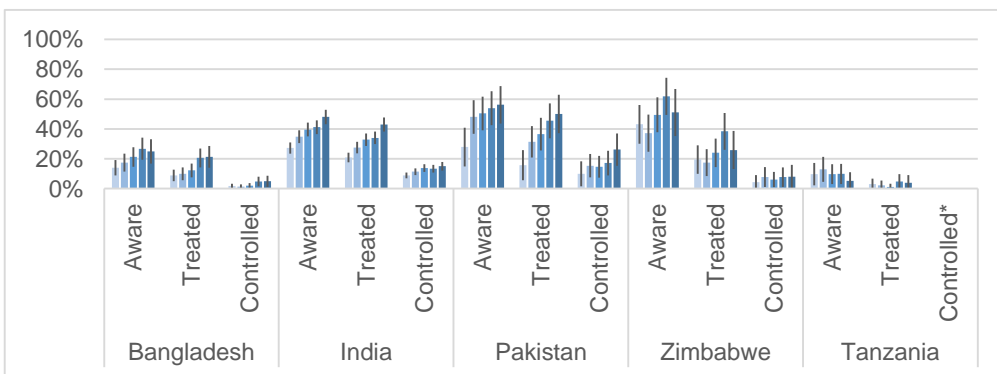

Supplement: 12939_2016_478_MOESM8_ESM.pdf [file 12939_2016_478_MOESM8_ESM.pdf]
