# Supplementary material for: Wealth and cardiovascular health: a cross-sectional study of wealth-related inequalities in the awareness, treatment and control of hypertension in high-, middle- and low-income countries
Source: Springer Nature journal article supplement (doi:10.1186/s12939-016-0478-6), 2016-12-01

**Appendix S7: Patterns of adjusted hypertension prevalence with 95% confidence intervals within PURE cohorts by wealth quintile, and standardised hypertension concentration indices with 95% confidence intervals, by country (ordered by 2006 GDP)**

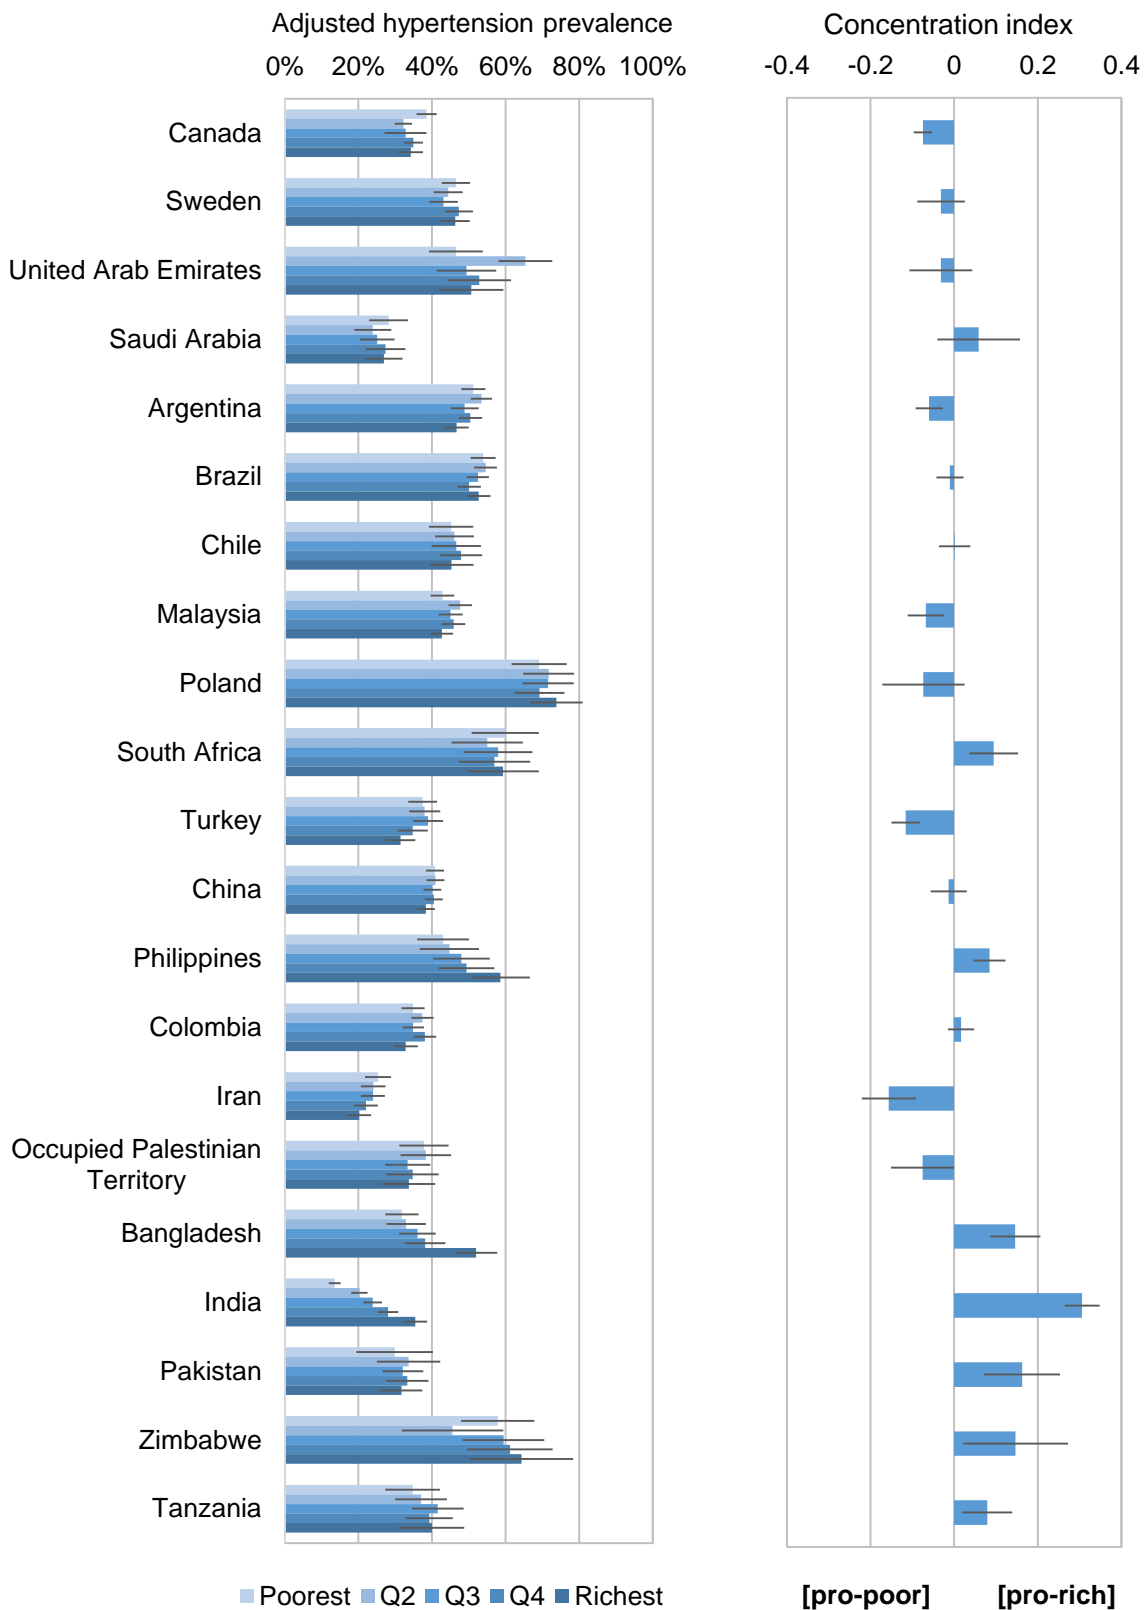

Supplement: MOESM7 [file 11807118]
