# Supplementary material for: Wealth and cardiovascular health: a cross-sectional study of wealth-related inequalities in the awareness, treatment and control of hypertension in high-, middle- and low-income countries
Source: Springer Nature journal article supplement (doi:10.1186/s12939-016-0478-6), 2016-12-01

**Appendix S9: Magnitude of wealth-related inequalities in hypertension prevalence, awareness, treatment and control measured by slope index of inequality with 95% confidence interval, by country (ordered by 2006 GDP)**

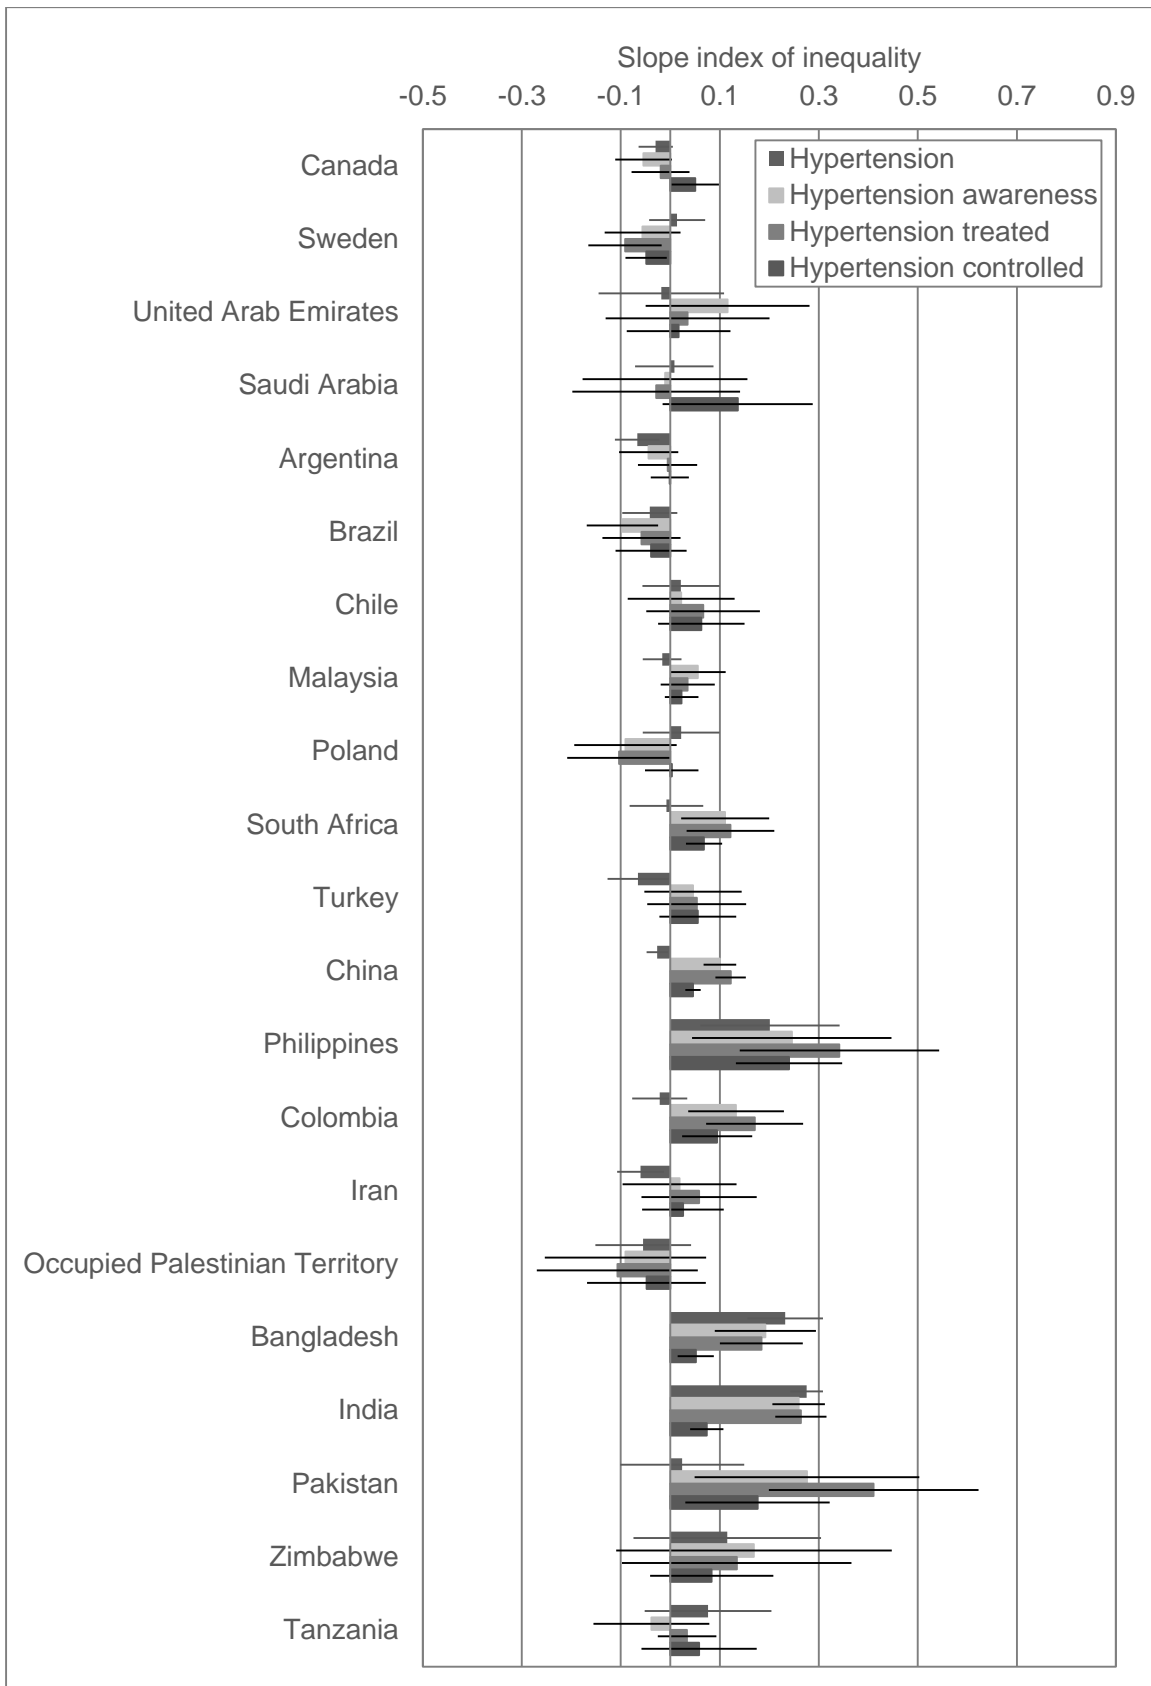

Supplement: MOESM9 [file 11807118]
